# Supplementary material
Source: Springer Nature journal article supplement (https://springermedizin.de/resource/supplementary/12955_2009_670_MOESM9_ESM.pdf/9561042)

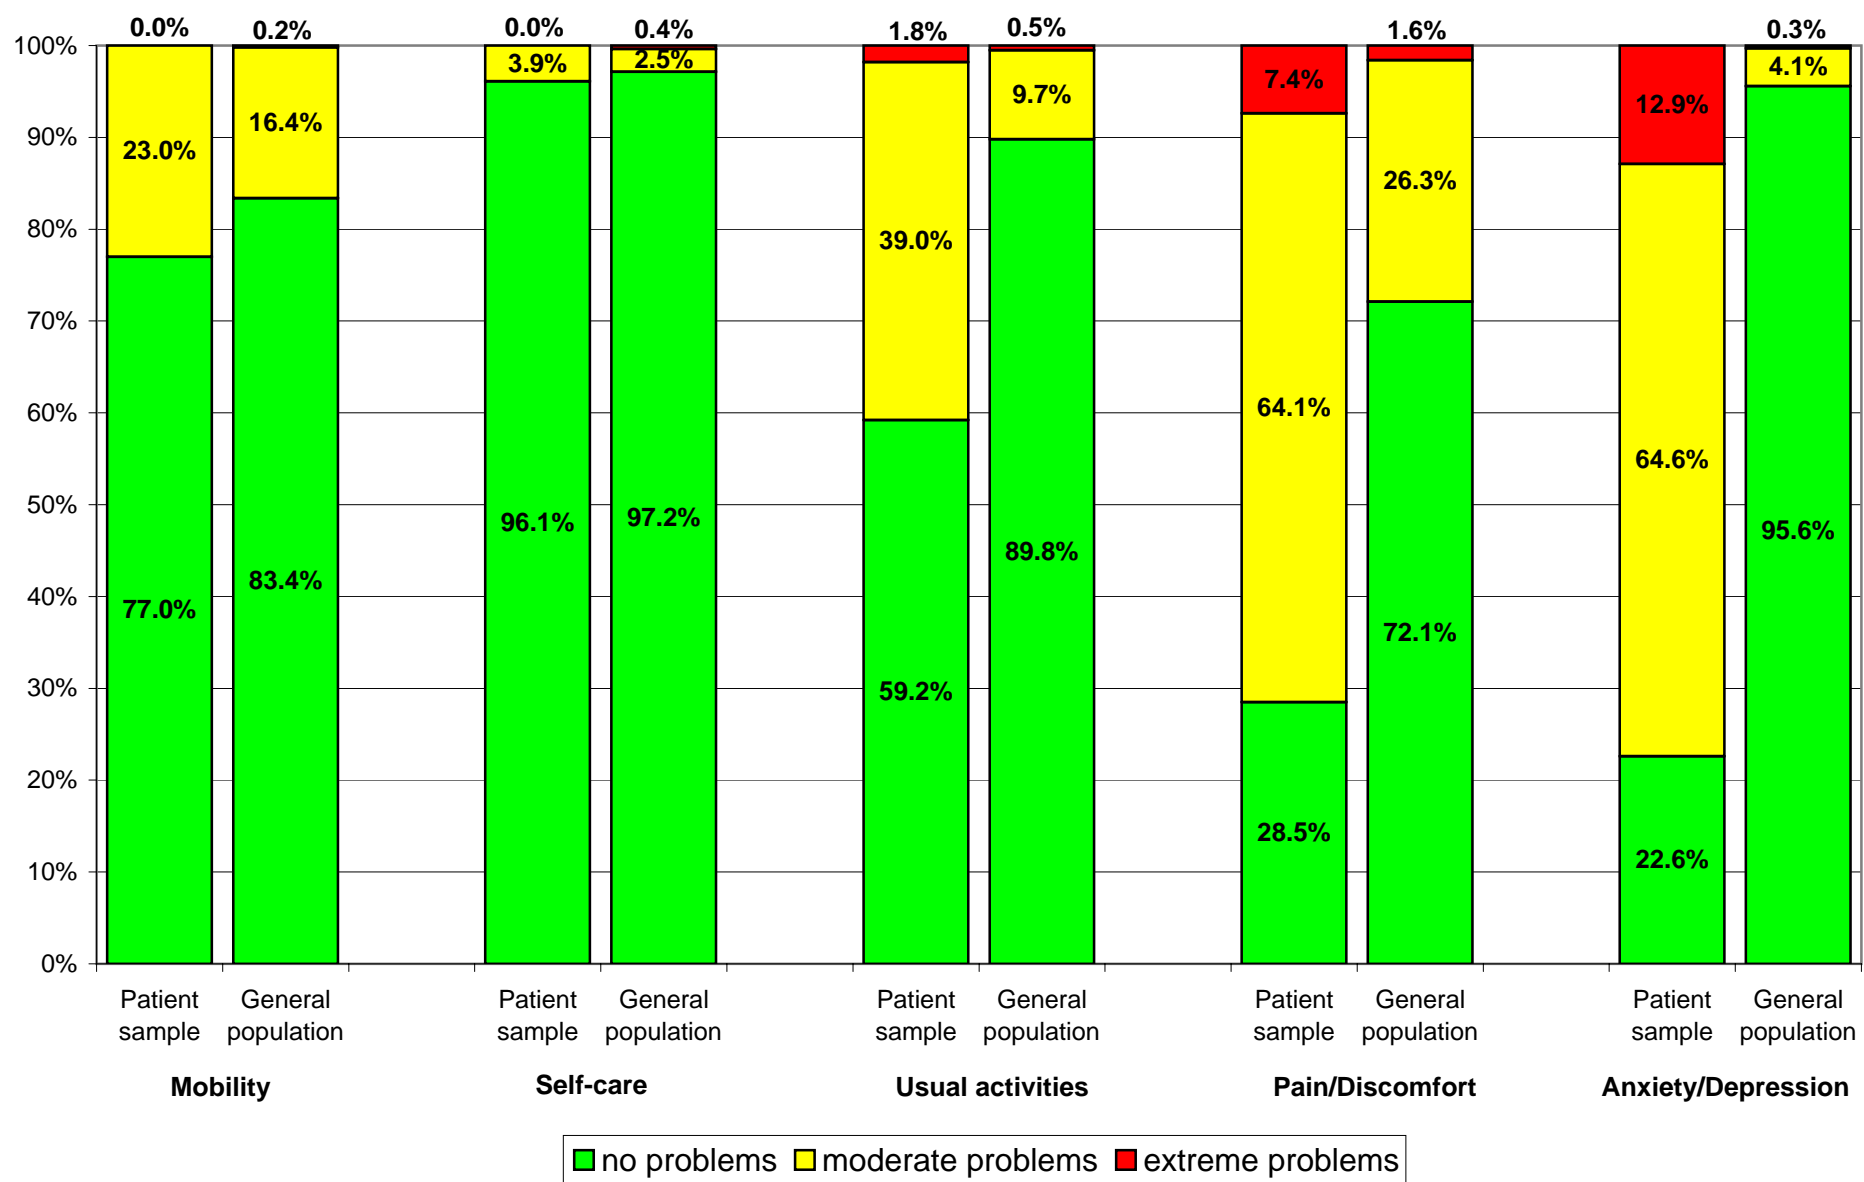

Supplement: MOESM9 [file 9561042]
